# Supplementary material for: Patterning two-dimensional chalcogenide crystals of Bi2Se3 and In2Se3 and efficient photodetectors
Source: PubMed Central journal article supplement (PMC4411293; doi:10.1038/ncomms7972), 2015-04-21
Supplement: ncomms7972-s1.pdf [file ncomms7972-s1.pdf]

## Supplementary Figures

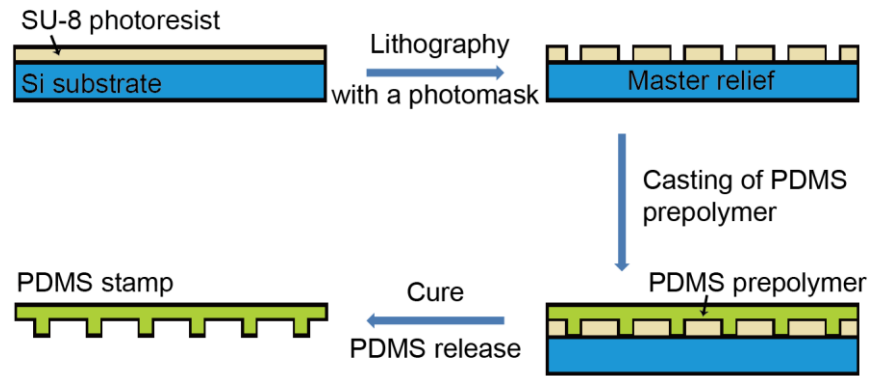

**Supplementary Figure 1. Schematic of fabrication procedures of PDMS stamps and detailed procedure of PDMS stamp fabrication.**

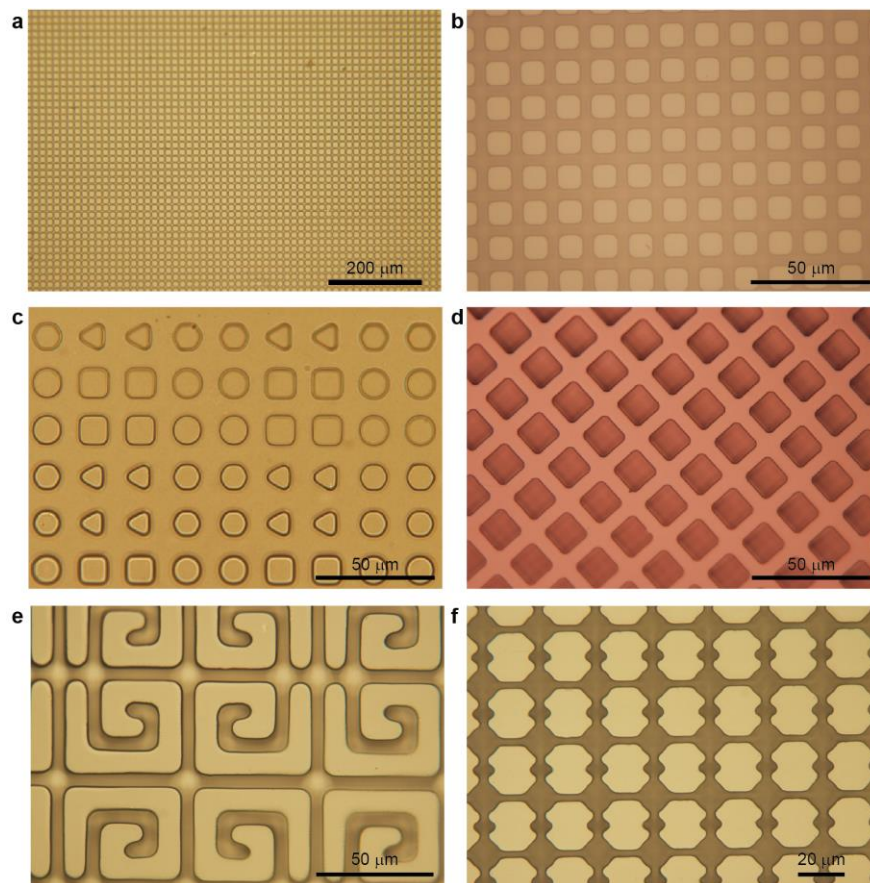

**Supplementary Figure 2. OM images of typical PDMS stamps with a variety of relief structures. a, b,** OM Images of PDMS stamps with square pillars which have a length of  $10\ \mu\text{m}$  and a periodicity of  $15\ \mu\text{m}$ . **c,** OM Image of a complex PDMS stamp with  $2 \times 2$  hexagonal, triangular, circular and square pillars which have a periodicity of  $20\ \mu\text{m}$ . **d,** OM Image of a PDMS stamp with square wells which have a length of  $15\ \mu\text{m}$  and a periodicity of  $20\ \mu\text{m}$ . **e,** OM Image of a PDMS stamp with spiral patterns. **f,** OM Image of a PDMS stamp with dumbbell-like patterns.

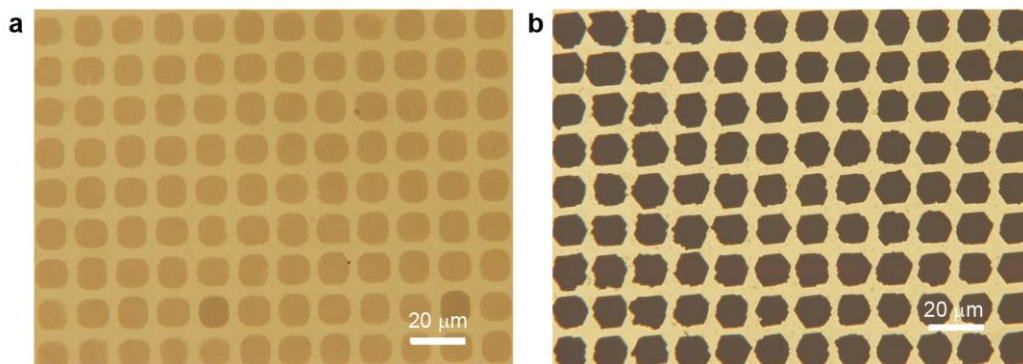

**Supplementary Figure 3. Thickness control of 2D crystals.** **a**, OM image of an array of ultrathin  $\text{Bi}_2\text{Se}_3$  nanoplate with  $\sim 2$  nm in thickness. **b**, OM image of an array of thick  $\text{Bi}_2\text{Se}_3$  nanoplates with  $\sim 30$  nm in thickness.

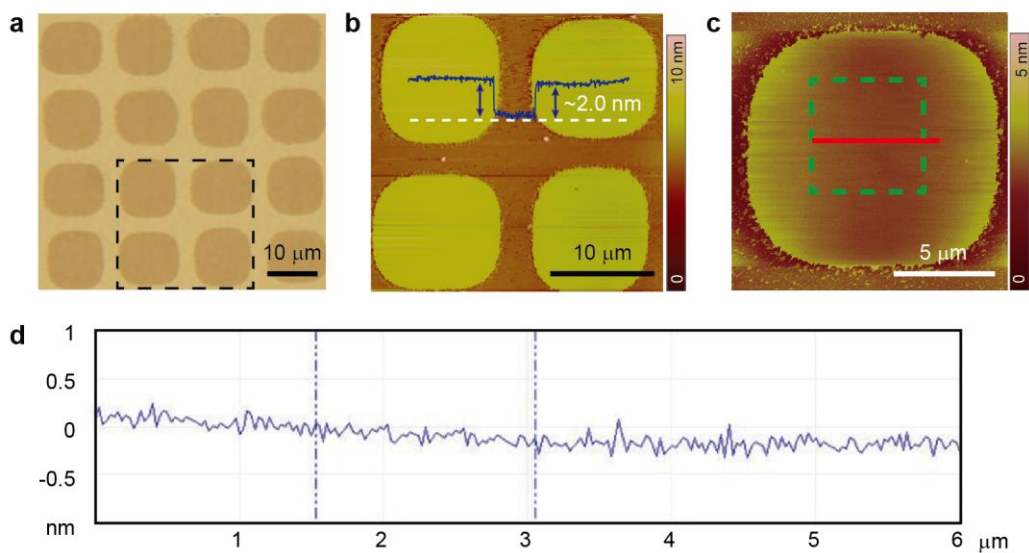

**Supplementary Figure 4. Patterned arrays of ultrathin 2D Bi<sub>2</sub>Se<sub>3</sub> crystals.** **a.** OM image of an array of ultrathin 2D Bi<sub>2</sub>Se<sub>3</sub> crystals with uniform thickness of ~2 nm. **b.** AFM image of the 2 × 2 Bi<sub>2</sub>Se<sub>3</sub> nanoplate array shown in the dashed black box in (a). **c.** Detailed AFM image of the nanoplate in the left bottom corner in (b). **d.** Height profile along the red line in (c), confirming the ultra-flat surface morphology.

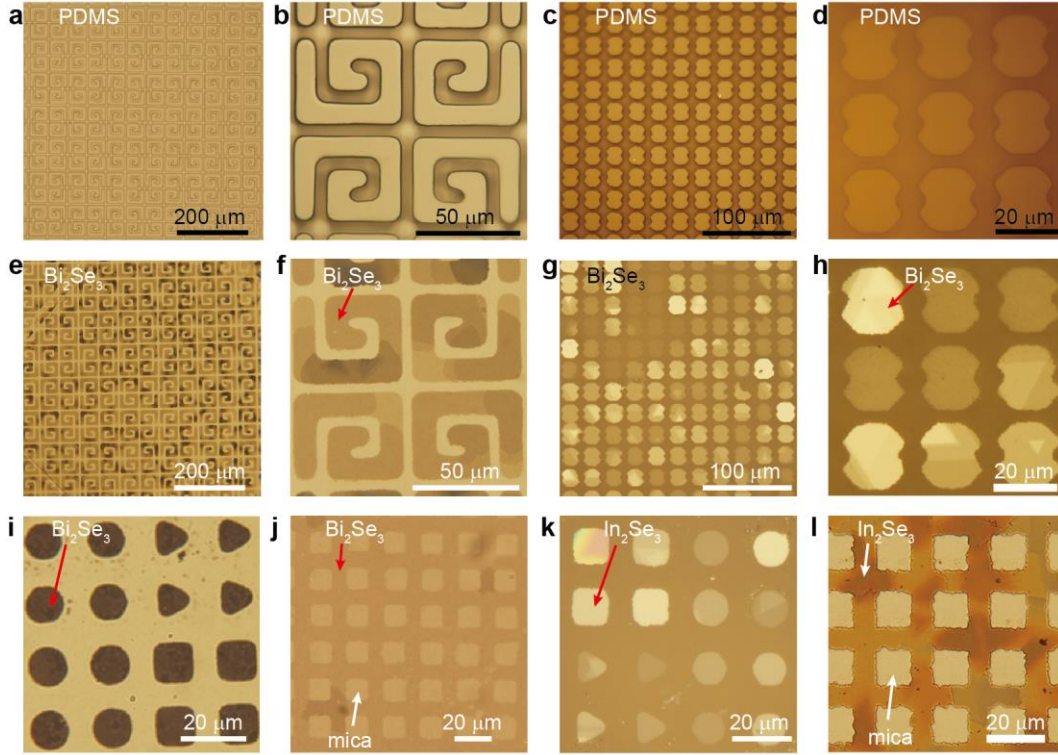

**Supplementary Figure 5. Complex 2D crystal arrays with different feature sizes and pattern layouts grown on mica using special PDMS stamps with desired patterns. a-b,** Reflection-mode OM images of PDMS consisting of spiral pattern arrays. **c-d,** Reflection-mode OM images of PDMS consisting of dumbbell-like pattern arrays. **e-f,** Transmission-mode OM images of spiral nanoplatform arrays of  $\text{Bi}_2\text{Se}_3$  patterned with the PDMS stamps shown in (a,b). **g-h,** Reflection-mode OM images of dumbbell-like nanoplatform arrays of  $\text{Bi}_2\text{Se}_3$  patterned with the PDMS stamps shown in (c,d). **i,** Transmission-mode OM images of patterned 2D  $\text{Bi}_2\text{Se}_3$  with different shapes:  $2 \times 2$  hexagonal (top left), triangular (top right), circular (bottom left) and square (bottom right) nanoplatforms patterned at nearby regions. The periodicity is  $20 \mu\text{m}$ . **j,** Patterned 2D  $\text{Bi}_2\text{Se}_3$  mesh with a periodicity of  $20 \mu\text{m}$ . **k,** OM image of ultrathin patterned 2D  $\text{In}_2\text{Se}_3$  with different structures at nearby regions. **l,** OM image of patterned 2D  $\text{In}_2\text{Se}_3$  mesh.

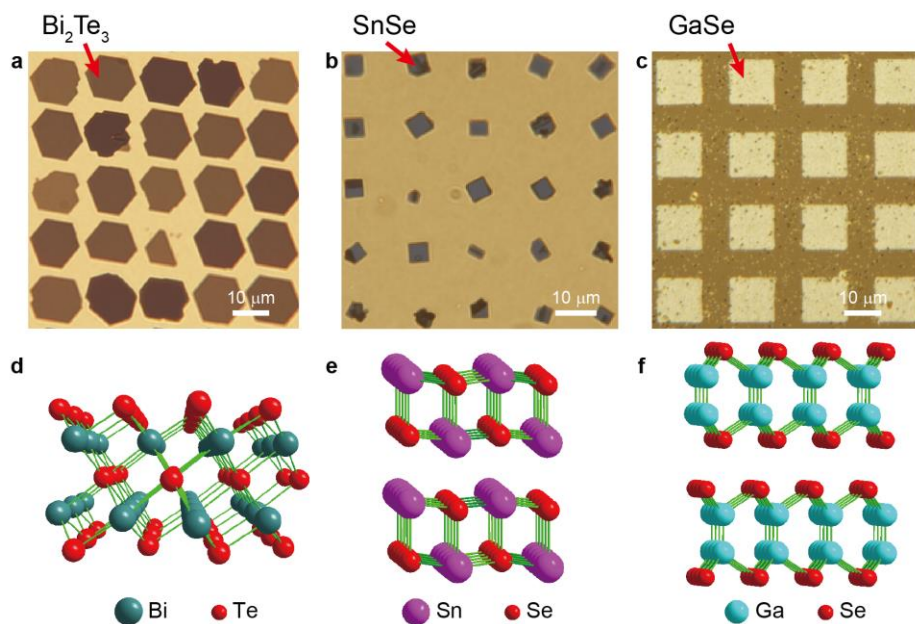

**Supplementary Figure 6. Patterning of a variety of 2D chalcogenide crystals.** **a-c**, OM images of patterned 2D V-VI chalcogenide  $\text{Bi}_2\text{Te}_3$ , IV-VI chalcogenide  $\text{SnSe}$ , and III-VI chalcogenide  $\text{GaSe}$ , respectively. **d-f**, the corresponding crystal structures of layered  $\text{Bi}_2\text{Te}_3$ ,  $\text{SnSe}$ , and  $\text{GaSe}$ , respectively.

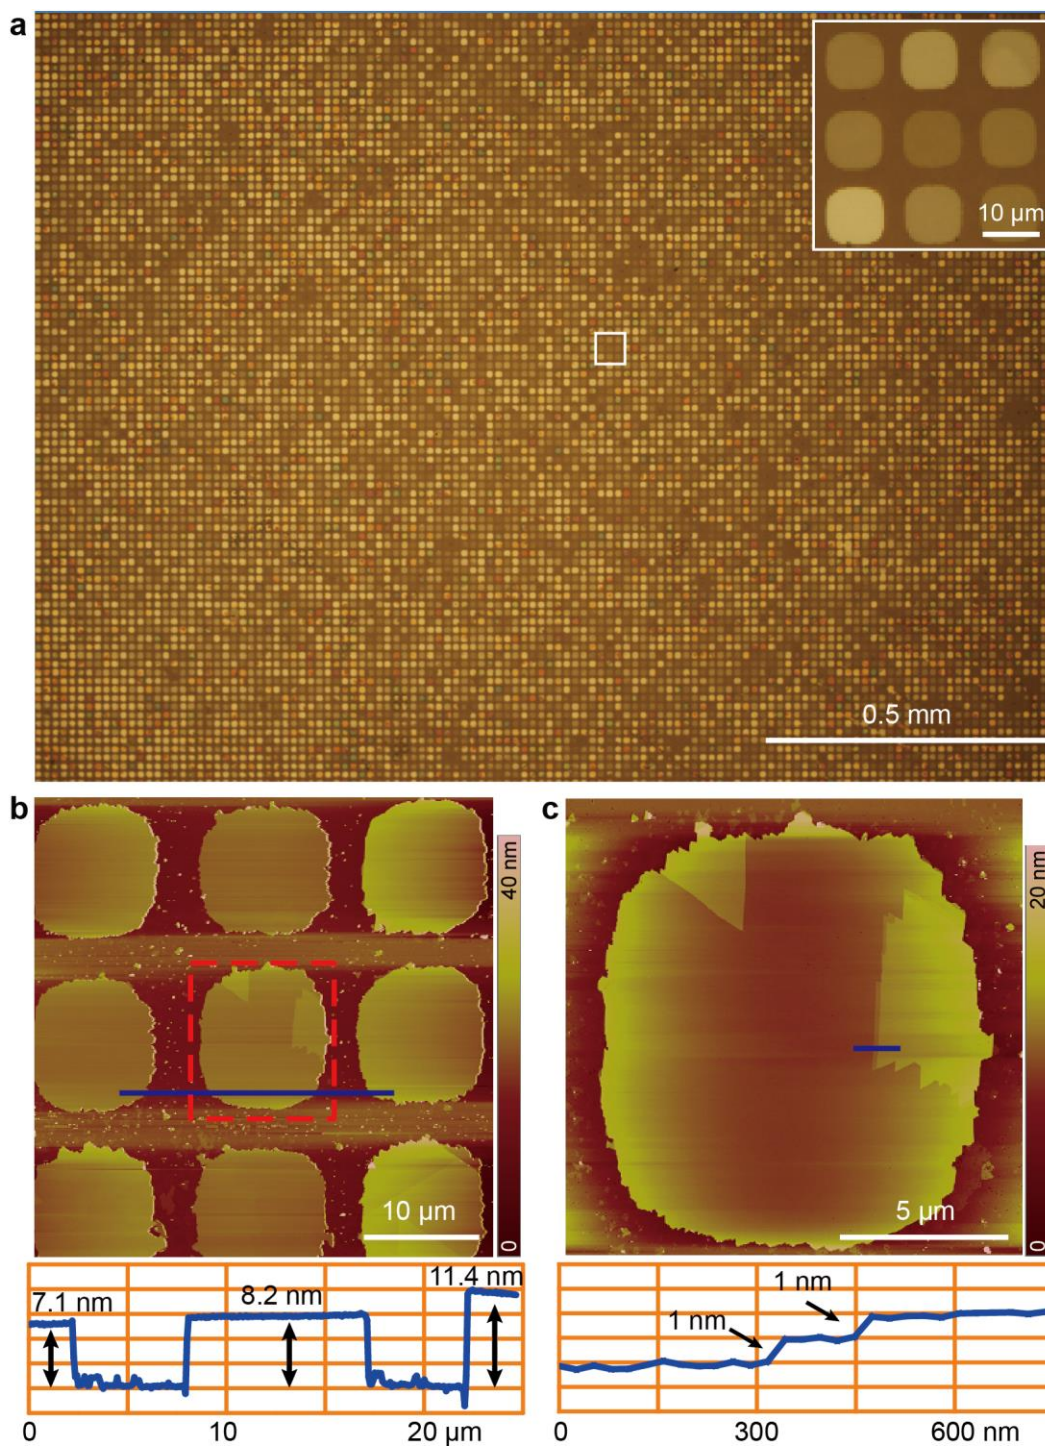

**Supplementary Figure 7. OM and AFM images of patterned 2D  $\text{In}_2\text{Se}_3$  crystal arrays.** **a**, OM image of large area  $\text{In}_2\text{Se}_3$  nanoplates patterned on transparent mica substrate. This  $2.5\ \text{mm}^2$  region contains more than 10,000 uniform  $\text{In}_2\text{Se}_3$  nanoplates. Inset: Enlarged image of 2D  $\text{In}_2\text{Se}_3$  crystal array captured from the white box area of (a).

**b**, A  $3 \times 3$  array of  $\text{In}_2\text{Se}_3$  nanoplates and its corresponding height profile along the blue line in the AFM image. The thickness of  $\text{In}_2\text{Se}_3$  nanoplates is around 8.2 nm, corresponding to 8 quintuple layers (QLs). **c**, Corresponding enlarged AFM image of the nanoplate shown in the dashed red box in (b). The height of the steps is about 1 nm which is consistent with the height of 1 QL of layered  $\text{In}_2\text{Se}_3$ .



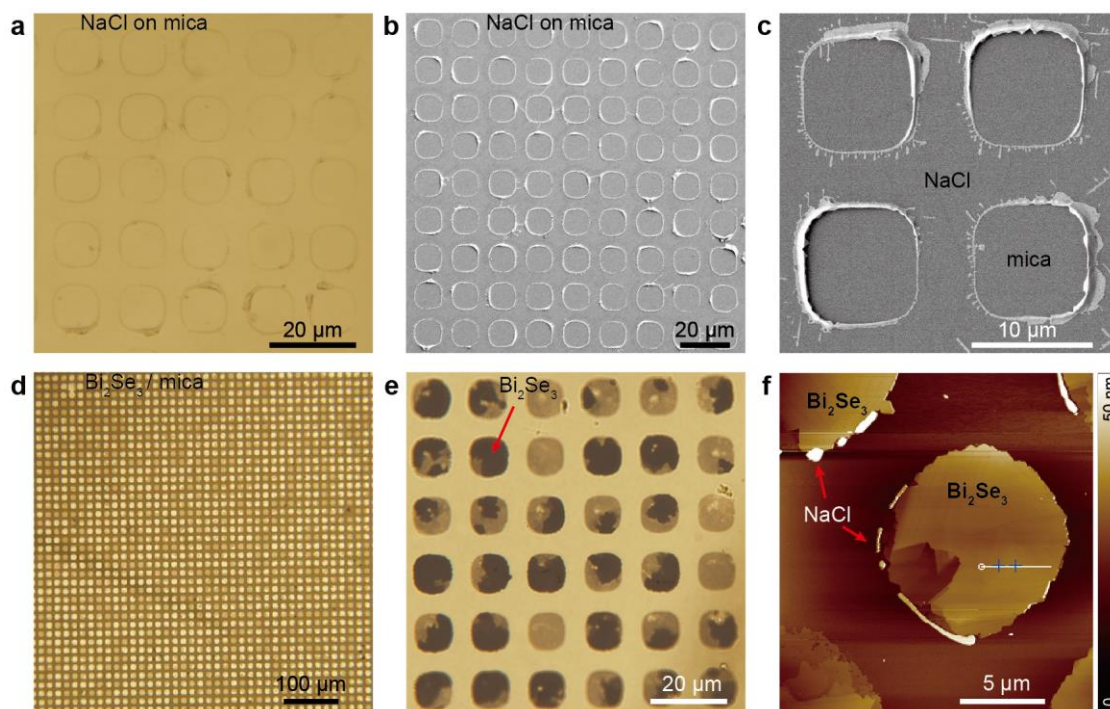

**Supplementary Figure 8. Patterning of 2D  $\text{Bi}_2\text{Se}_3$  crystals using NaCl aqueous solution as an ink.** **a**, Transmission-mode OM image of NaCl crystal imprint on mica using 0.1 mol/L NaCl aqueous solution as the ink. **b-c**, Typical SEM images of NaCl crystal pattern micro-intaglio printed on mica. **d-e**, Transmission-mode OM images of 2D  $\text{Bi}_2\text{Se}_3$  arrays grown on exposed mica surface using the NaCl crystal template. **f**, Typical AFM image of 2D layered  $\text{Bi}_2\text{Se}_3$  crystals grown on the mica substrate defined by the 2D NaCl crystal template.

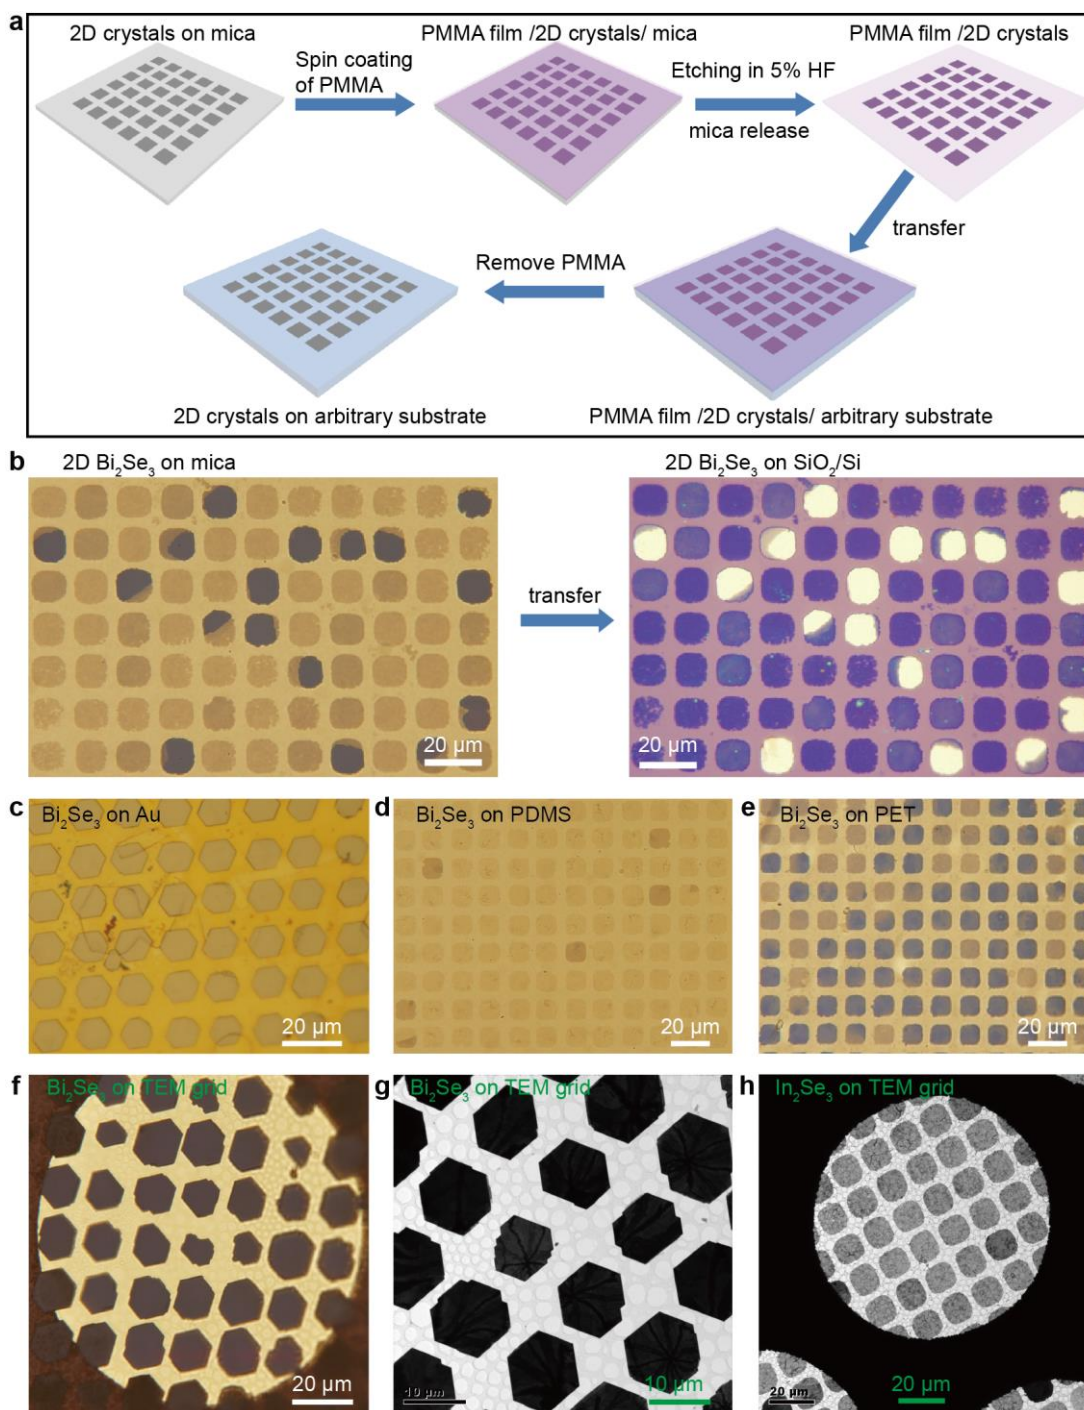

**Supplementary Figure 9. Faithful transfer of 2D crystals from mica onto arbitrary substrates.** **a**, Schematic diagram for the PMMA-mediated transfer technique.<sup>2</sup> **b,c**, Optical images of 2D  $\text{Bi}_2\text{Se}_3$  crystals before and after transfer, respectively. **c-f**, Optical images of 2D  $\text{Bi}_2\text{Se}_3$  crystals transferred onto thin Au film, a soft PDMS matrix,

transparent PET plastic, a TEM grid, respectively. **g**, TEM image of 2D Bi<sub>2</sub>Se<sub>3</sub> crystals on a TEM grid. **h**, TEM image of 2D In<sub>2</sub>Se<sub>3</sub> crystals transferred onto a TEM grid.

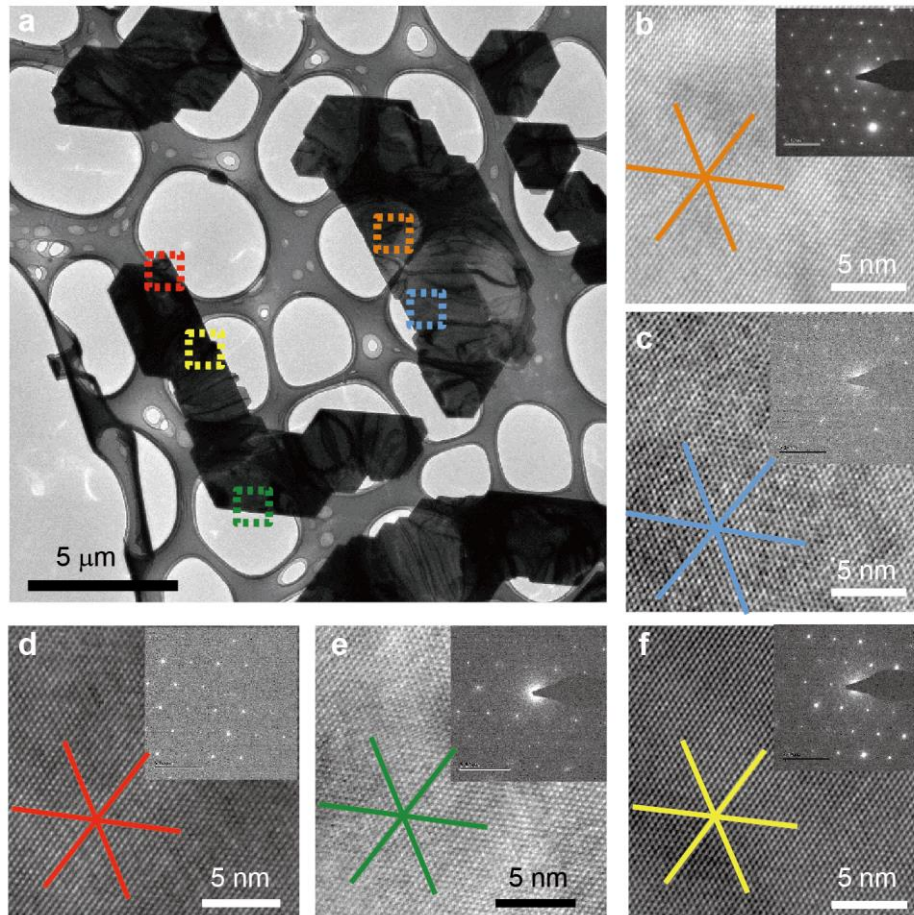

**Supplementary Figure 10. Alignment and merging of 2D chalcogenide crystal islands.** **a**, TEM image of 2D single crystals of  $\text{Bi}_2\text{Se}_3$  that merged by several aligned crystal islands. **b-f**, HRTEM images and SAED patterns from selective areas indicated by color dash squares shown in (a). The orientation of crystal lattices and diffraction spots is identical, which indicates that 2D chalcogenide crystal islands can merge to a single crystal ring and nanoplate.

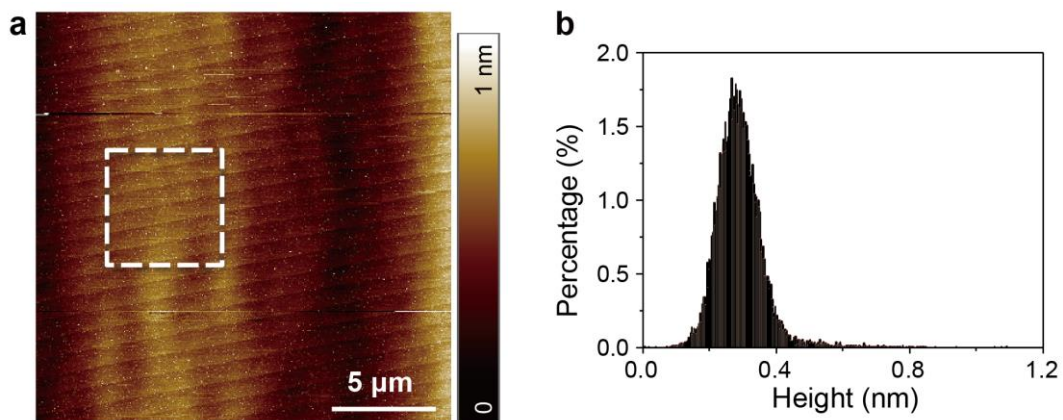

**Supplementary Figure 11. Ultraflat surface of a mica substrate. a,** Typical AFM image of the ultra-smooth surface of a freshly cleaved mica substrate. **b,** Height distribution diagram of indicated area shown in (a).

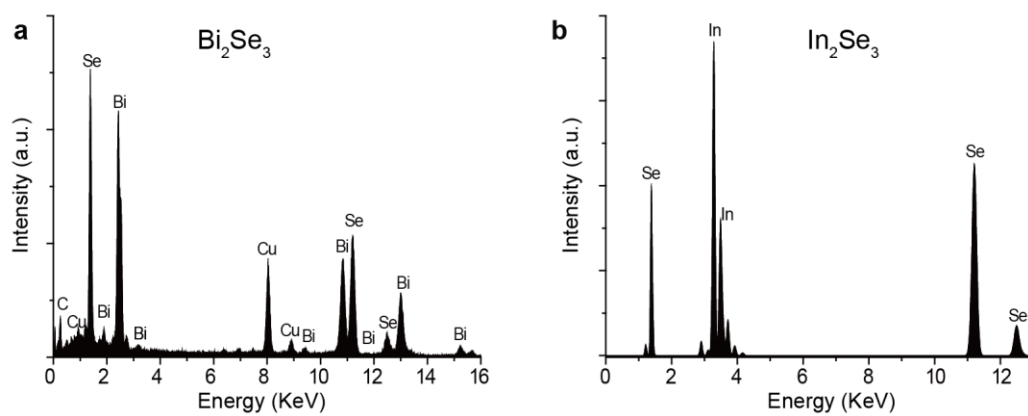

**Supplementary Figure 12.** EDX analyses of 2D crystals of  $\text{Bi}_2\text{Se}_3$  (a) and  $\text{In}_2\text{Se}_3$  (b). The Cu and C signals come from the TEM grid.

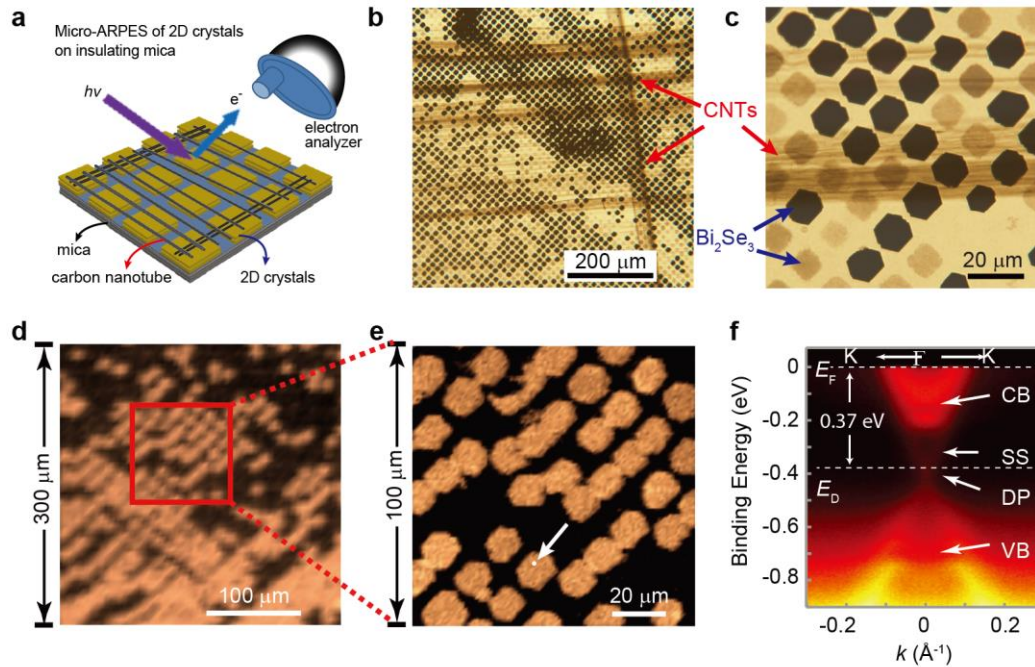

**Supplementary Figure 13. Micro-ARPES measurements of  $\text{Bi}_2\text{Se}_3$  crystal arrays grown on insulating mica substrates.** **a**, Schematic of preparation of micro-ARPES samples to avoid charging effect of insulating mica substrate. The samples were covered with aligned arrays of carbon nanotubes dry-transferred from vertical array of carbon nanotube forests. **b,c**, Typical OM images of 2D  $\text{Bi}_2\text{Se}_3$  crystal arrays grown on mica that were covered with aligned arrays of carbon nanotubes. **d,e**, Full valence spectra contrast maps of the 2D  $\text{Bi}_2\text{Se}_3$  crystal array with coarse and fine scans, respectively. **f**, Measured electronic band structure of a  $\text{Bi}_2\text{Se}_3$  crystal taken at the white arrow in (e) using micro-ARPES with beam spot size of  $<1 \mu\text{m}$ , which reveals a direct bulk gap and surface states consisting of a single Dirac cone, a hallmark of the topological insulator. The conduction band (CB), valence band (VB), surface state (SS) and Dirac point (DP) are indicated, together with the Fermi energy ( $E_F$ ), the energy level of Dirac point ( $E_D$ ), and wave vector  $k$ .

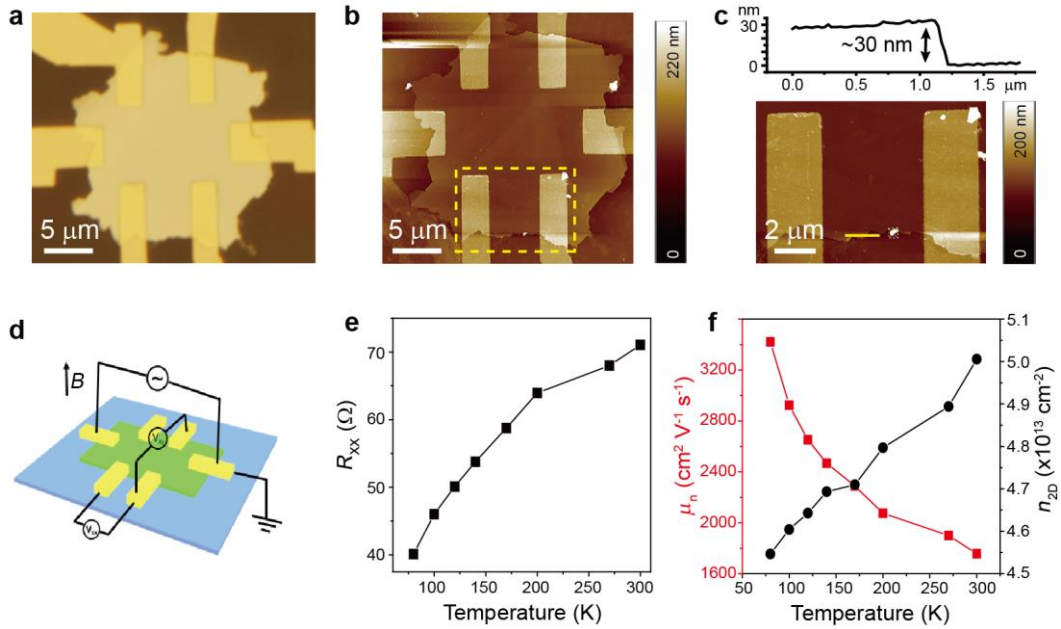

**Supplementary Figure 14. Transport measurements of a ~30-QL-thick  $\text{Bi}_2\text{Se}_3$  nanoplate.** **a**, Typical optical microscopy image of a Hall-bar device fabricated on an individual  $\text{Bi}_2\text{Se}_3$  crystal selected from a 2D array. **b,c**, AFM images of patterned grown  $\text{Bi}_2\text{Se}_3$  Hall device and its height profile. **d**, The scheme of Hall measurements. **e**, The longitudinal resistance  $R_{XX}$  was plotted as a function of temperature. **f**, Hall mobility and carrier density as a function of temperature for an individual  $\text{Bi}_2\text{Se}_3$  crystal.



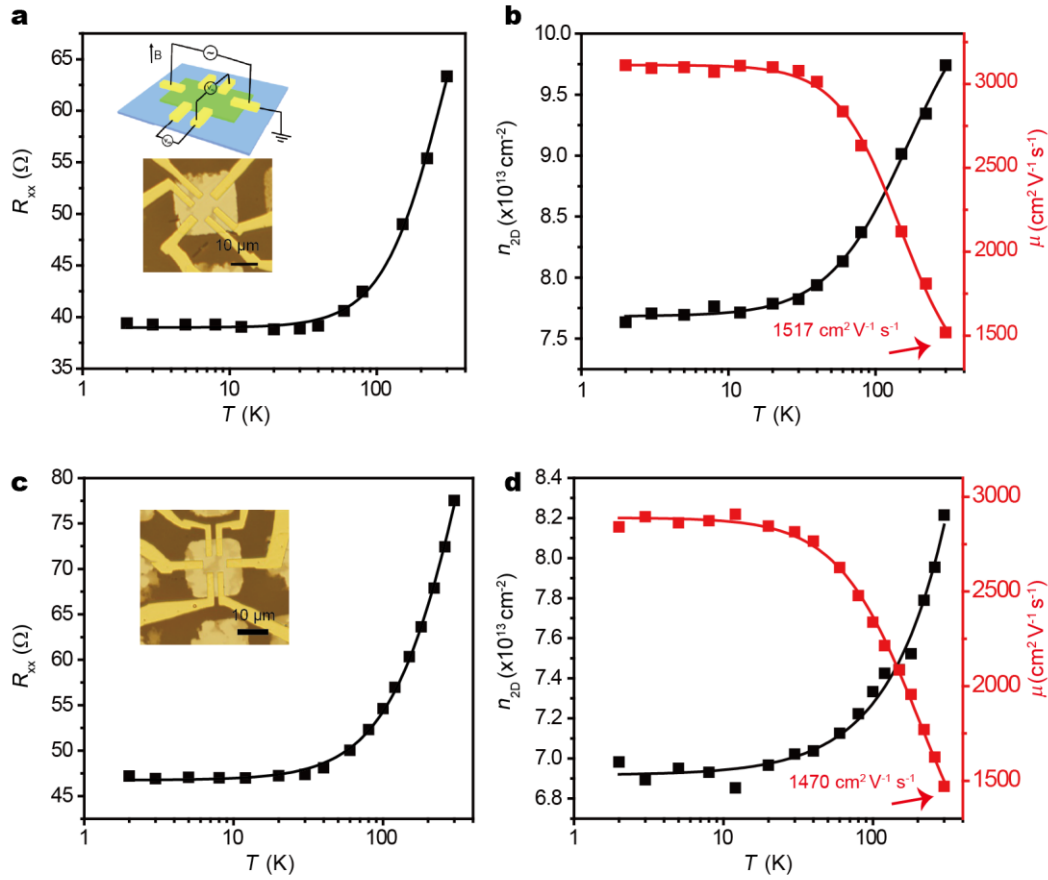

**Supplementary Figure 15. Transport measurements of two Hall bar devices from the 2D  $\text{Bi}_2\text{Se}_3$  crystal array.** **a**, The longitudinal resistance  $R_{xx}$  was plotted as a function of temperature, inset: the scheme of Hall measurements and the optical image of 2D  $\text{Bi}_2\text{Se}_3$  crystal. **b**, Hall mobility and carrier density as a function of temperature for the  $\text{Bi}_2\text{Se}_3$  crystal device shown in (a). The room temperature mobility is  $1517 \text{ cm}^2 \text{V}^{-1} \text{s}^{-1}$ . **c**, The longitudinal resistance  $R_{xx}$  was plotted as a function of temperature for a 2D  $\text{Bi}_2\text{Se}_3$  crystal with a rough surface. **d**, Hall mobility and carrier density as a function of temperature for the  $\text{Bi}_2\text{Se}_3$  crystal device shown in (c). The room temperature mobility is  $1470 \text{ cm}^2 \text{V}^{-1} \text{s}^{-1}$ .

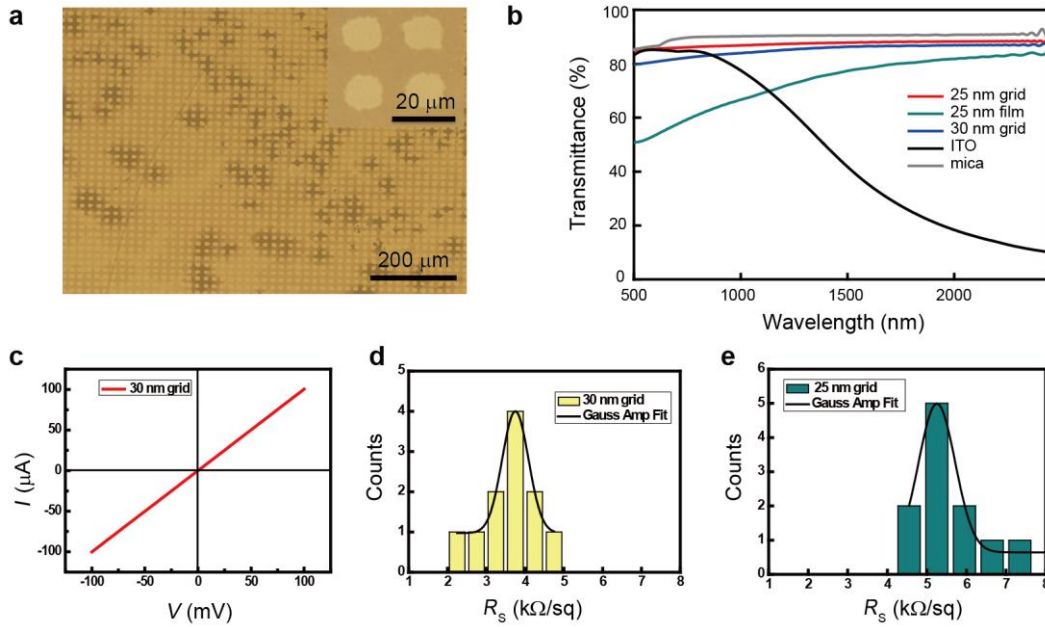

**Supplementary Figure 16. Grid networks containing 2D  $\text{Bi}_2\text{Se}_3$  crystals for flexible transparent electrodes.** **a**, Typical optical microscopy images in transmission mode of large-area, few-layer  $\text{Bi}_2\text{Se}_3$  grids with circular shaped apertures grown on mica substrates. **b**, Transmittance spectrum of  $\text{Bi}_2\text{Se}_3$  grid electrodes with different thicknesses on mica, as well as for pure mica substrate (grey), ITO (black), and the 25-nm-thick  $\text{Bi}_2\text{Se}_3$  film electrode (green). The sharp oscillatory features come from Fabry-Perot interference effects. **c**, Source-drain current ( $I$ ) versus voltage ( $V$ ) characteristics for  $\text{Bi}_2\text{Se}_3$  grids. **d**, **e**, Histograms of sheet resistance distributions of  $\text{Bi}_2\text{Se}_3$  grids with thickness of 30 nm and 25 nm, respectively.

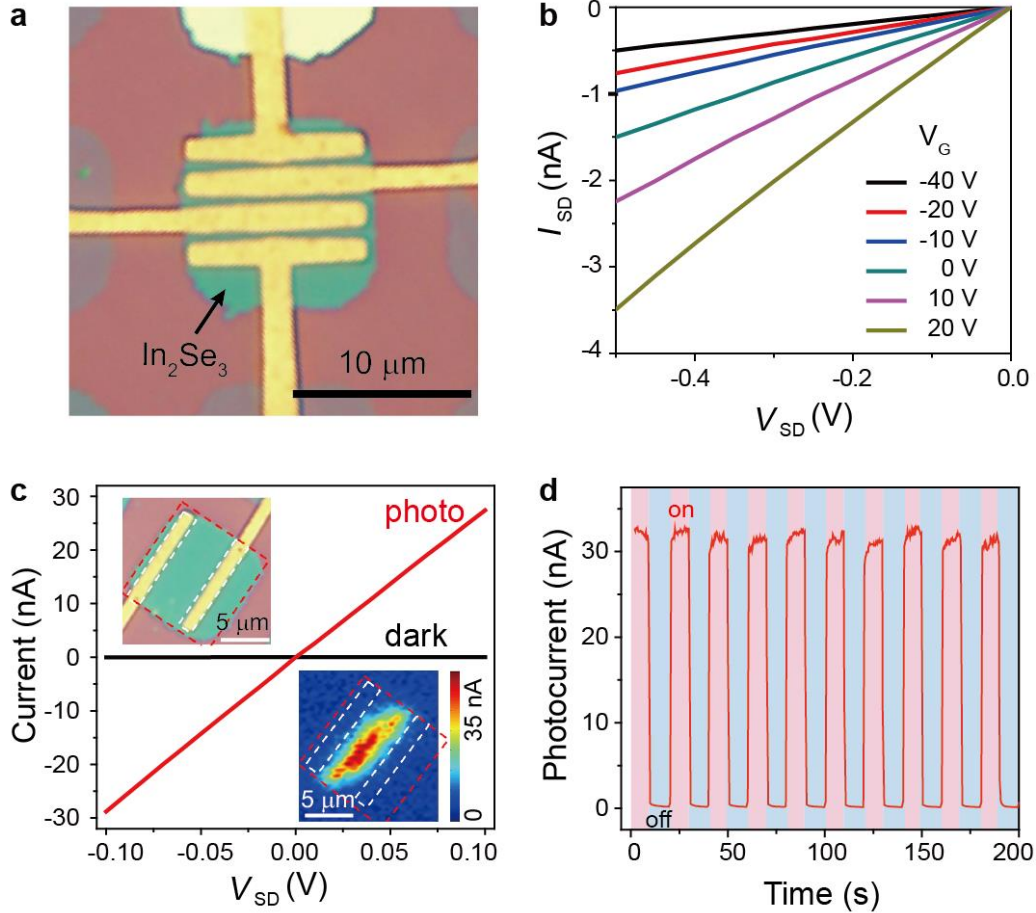

**Supplementary Figure 17. Transport and photoresponse measurements of 2D  $\text{In}_2\text{Se}_3$  crystals transferred onto  $\text{SiO}_2/\text{Si}$  substrate.** **a**, Optical microscopy image of a back-gated FET device of individual  $\text{In}_2\text{Se}_3$  crystal on  $\text{SiO}_2/\text{Si}$  substrate. **b**, Typical gate dependent dark current-voltage ( $I_{\text{SD}}-V_{\text{SD}}$ ) curves of individual  $\text{In}_2\text{Se}_3$  crystal at room temperature. **c**, Current versus source-drain bias with (red curve) and without (black curve) 633 nm laser beam focused at  $\text{In}_2\text{Se}_3$  channel.  $V_{\text{g}} = 0\ \text{V}$ ,  $P_{\text{inc}} = 100\ \mu\text{W}$ . Inset: Optical microscopy image of the device (left) and corresponding spatial photocurrent map (right) recorded by a focused laser beam scanning over the whole photodetector. Electrodes and  $\text{In}_2\text{Se}_3$  channel indicated as dashed lines.  $V_{\text{SD}} = 1\ \text{V}$ ,  $V_{\text{g}} = 0\ \text{V}$ ,  $P_{\text{inc}} = 35\ \text{nW}$ . **d**, Stable and repeatable photoresponse of the device with the light illumination switched off or on.  $V_{\text{g}} = 0\ \text{V}$ ,  $P_{\text{inc}} = 100\ \mu\text{W}$ .

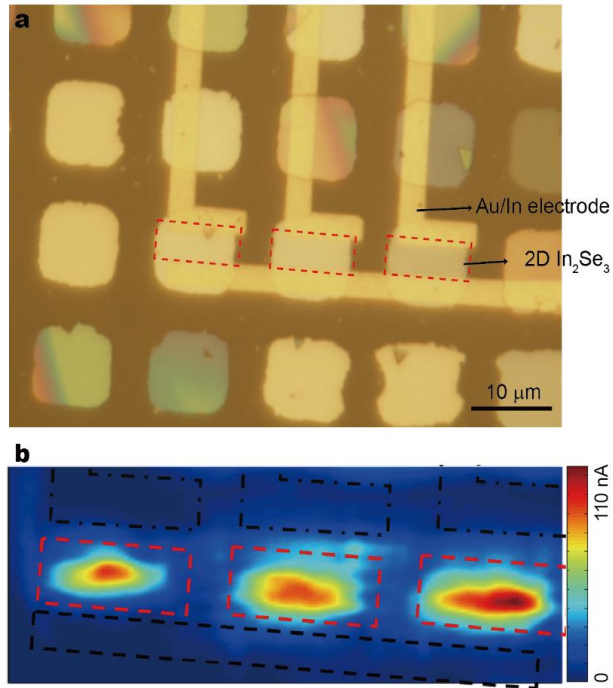

**Supplementary Figure 18. Photocurrent mapping of a 2D In<sub>2</sub>Se<sub>3</sub> crystal array based photodetection devices fabricated on mica substrate. a,** Optical microscopy image of the photodetector array device. **b,** The spatial photocurrent map by a focused laser beam scanning over the whole photodetector array in a. Au/In electrodes and In<sub>2</sub>Se<sub>3</sub> channels indicated as dashed lines.  $V_{sd} = 2 \text{ V}$ ,  $P_{inc} = 73 \text{ } \mu\text{W}$ .

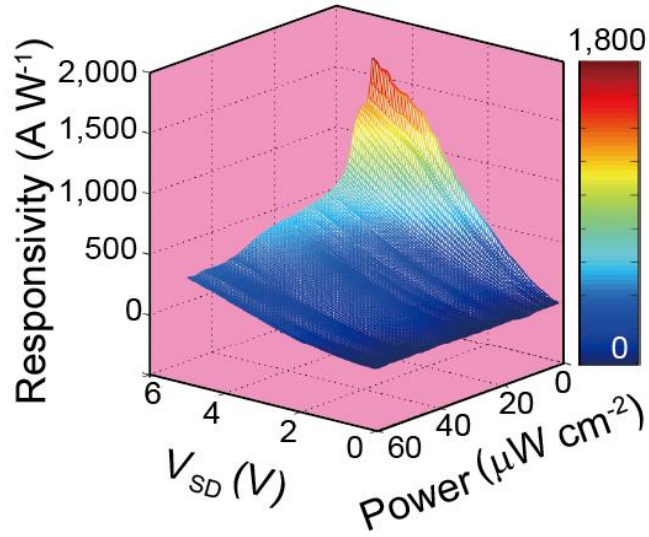

**Supplementary Figure 19.** 3D photoresponsivity map of the In<sub>2</sub>Se<sub>3</sub> photodetector showing a remarkable responsivity of 1650 AW<sup>-1</sup> at 5 V bias. The photoresponsivity can be modulated by the bias voltage, suggesting higher responsivity can be readily achieved by applying a larger bias voltage.

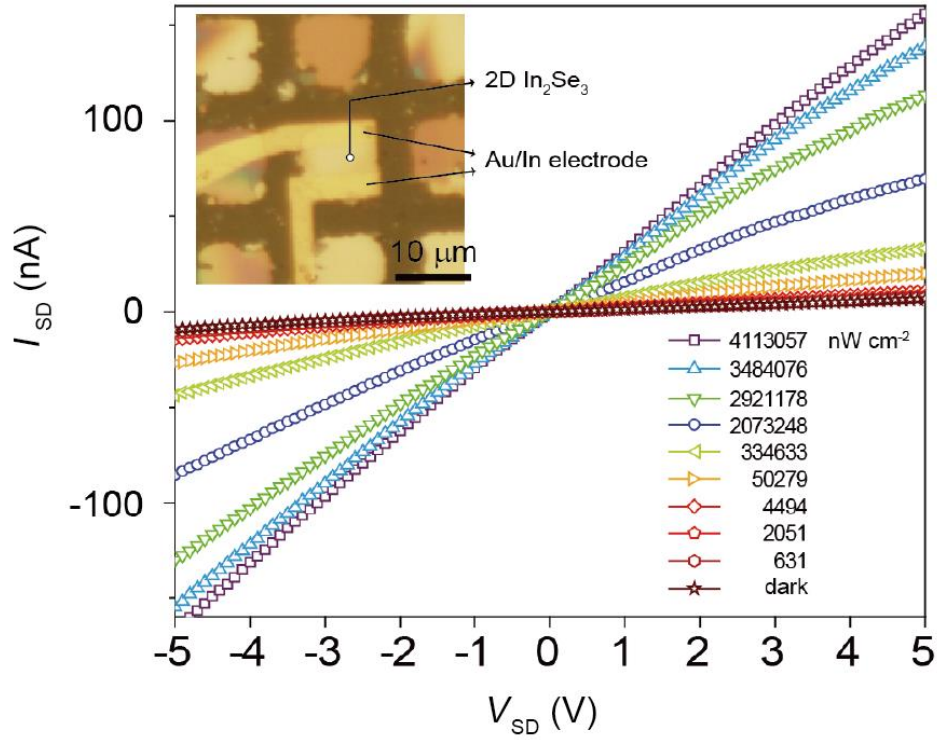

**Supplementary Figure 20.** The highest photoresponsivity of a 2D  $\text{In}_2\text{Se}_3$  crystal grown on a mica substrate is measured as 4470  $\text{A/W}$  at a bias of 5 V.

**Supplementary Table 1. Wettability of PMDS stamp with different solvent**

| Solvent                              | Contact angle   | Images obtained from contact angle goniometer |
|--------------------------------------|-----------------|-----------------------------------------------|
| acetone                              | $33.6 \pm 2.0$  |                                               |
| ethanol                              | $25.6 \pm 2.6$  |                                               |
| NaCl in H <sub>2</sub> O (0.1 mol/L) | $106.4 \pm 5.4$ |                                               |
| H <sub>2</sub> O                     | $105.4 \pm 1.7$ |                                               |

**Supplementary Table 2. Growth conditions for various 2D crystals**

|                                 | Source Temp. (°C) | Substrate Temp. (°C) | Flow rate (sccm) | Pressure (Torr) | Growth time (min) |
|---------------------------------|-------------------|----------------------|------------------|-----------------|-------------------|
| GaSe                            | 750-850           | 720-620              | 100              | 20              | 5-40              |
| In <sub>2</sub> Se <sub>3</sub> | 680-750           | 600-650              | 60-150           | 20-30           | 5-40              |
| SnSe                            | 550-650           | 380-500              | 100              | 40-60           | 5-40              |
| Bi <sub>2</sub> Se <sub>3</sub> | 480-530           | 330-430              | 80-500           | 20-100          | 5-500             |
| Bi <sub>2</sub> Te <sub>3</sub> | 450-500           | 300-400              | 100-300          | 20-100          | 5-60              |

### **Supplementary Note 1. Detailed procedure of PDMS stamp fabrication**

Polydimethylsiloxane (PDMS) stamps with relief structures consisting of desired patterns were prepared with standard photolithography and replica molding technique (Supplementary Figure 1).<sup>1</sup> Photoresist SU-8 2050 was first mixed with cyclopentanone (25 % ~75 % volume ratio to SU-8 2050) to form diluted photoresist with similar properties (by mass percentage of solid) to SU-8 2010, SU-8 2007 or SU-8 2005. Then, the diluted SU-8 photoresist was patterned on a Si substrate using a chrome/quartz mask consisting of negative structures with standard photolithography and development process to produce a master with positive relief pattern. The master was cured at 200 °C for 20 min and then cooled down to room temperature to improve the interaction between the SU-8 photoresist and Si substrate. After that, a mixture of PDMS prepolymer and cross-linker (10:1 by mass) was poured on the master and cured at 90 °C for 1h. Finally, the PDMS mold was peeled off from the master and cut into 1.5 cm × 1.5 cm stamps. Supplementary Figure 2 shows some typical optical microscopy (OM) images of as-obtained PDMS stamps used for the micro-intaglio printing of solvent inks and the patterning of two-dimensional (2D) chalcogenide crystals.

### **Supplementary Note 2. Thickness control of 2D crystals**

The uniform crystallization and layer-by-layer growth mode facilitate the thickness control of 2D crystals (Supplementary Figure 3). We controlled the thickness of 2D crystals primarily by changing the source temperature and growth time. Supplementary Figure 3 shows typical results of thickness controlled growth results of 2D Bi<sub>2</sub>Se<sub>3</sub> nanoplate arrays. The only difference between the growth conditions for them is that the source temperature is 490 °C for Supplementary Figure 3a and 530 °C for Supplementary Figure 3b, respectively. If the growth time increases from 5 min that used for the sample in Supplementary Figure 3a to 8 hours, we can obtain a thick nanoplate array similar to the sample shown in Supplementary Figure 3b.

### **Supplementary Note 3. Ultrathin and uniform 2D crystals**



By finely tuning the growth conditions and taking advantage of the uniform crystallization and layer-by-layer growth mode of 2D Bi<sub>2</sub>Se<sub>3</sub> crystals, we can readily prepare 2D Bi<sub>2</sub>Se<sub>3</sub> arrays with domains of ~10 μm in size and a uniform thickness of as thin as ~2 nm. (Fig. 1d, Supplementary Figure 4)

The r.m.s. roughness of the nanoplate surface shown in the green dashed square is as small as 0.091 nm, comparable to the roughness of freshly cleaved mica surface. This ultra-flat surface confirms the layer-by-layer growth mechanism.

#### **Supplementary Note 4. Patterning of 2D crystals using an aqueous solution ink**

We printed an aqueous solution ink of NaCl (~0.1 mol/L) to form an intaglio pattern containing heat-stabilized inorganic crystal imprint on mica using a PDMS stamp with relief structures (Supplementary Figure 8). This observation confirms the micro-intaglio printing process based on PDMS stamps. With the assistance of NaCl crystal template on mica, ordered array of 2D Bi<sub>2</sub>Se<sub>3</sub> crystals was grown on exposed mica surface using the selective-area van der Waals epitaxy, which is faithfully reproduced from the relief structure of the PDMS stamp.

#### **Supplementary Note 5. Faithful transfer of 2D crystals from mica onto arbitrary substrates**

We have transferred the array of 2D chalcogenide crystals grown on mica substrates onto arbitrary substrates using a PMMA-mediated transfer technique.<sup>2</sup> First, a thin film of PMMA was formed to encapsulate 2D crystals on mica by spin-coating and baking of a PMMA solution (Micro Chem, 950 kg/mol, ~4 wt.% in anisole, spin-coating: 2000 rpm for 1 min, baking: 170 °C for 5 mins). A sticky tape with a square hole in the middle was pasted on the surface of PMMA/2D crystals/mica, then dip into HF solution (~5%) for about 30 mins to remove away the mica substrate. The 2D crystals/PMMA film supported by the sticky tape was transferred onto any arbitrary substrates. After the sticky tape was removed, the PMMA film was dissolved by acetone vapor, leaving the transferred 2D crystal array on the targeted substrate (Supplementary Figure 9a).

Supplementary Figure 9b and Supplementary Figure 9c show the optical images of 2D Bi<sub>2</sub>Se<sub>3</sub> crystals with a variety of morphologies grown on a mica substrate and after transferred on a SiO<sub>2</sub>/Si substrate, respectively, indicating an efficient and faithful transfer process. Supplementary Figure 9c-9f show typical transfer results of Bi<sub>2</sub>Se<sub>3</sub> crystal arrays on thin Au film, a soft PDMS substrate, transparent PET plastic, and a TEM grid, respectively. Such PMMA-mediated transfer technique is quite facile preparation route to TEM samples of 2D crystals, convenient for investigation of microstructures by TEM (Supplementary Figure 9g and Supplementary Figure 9h).

### **Supplementary Note 6. Merging of aligned 2D crystal islands to a single crystal**

Van der Waals epitaxy facilitates the growth of orientation-defined 2D crystals with six-fold symmetry on the surface of layered mica that has a pseudo-hexagonal structure. Due to the symmetry matching, 2D hexagonal crystals with identical orientations were predominantly grown on mica substrates. After transferring of 2D crystals onto the TEM grid, we observed that the orientations of the 2D nanoplates' edge were predominantly at multiples of  $\sim 60^\circ$ , consistent with the 2D hexagonal lattice. From the extensive HRTEM and SAED analyses, we found that the discrete 2D hexagonal crystal islands were unidirectionally aligned and then merged to uniform single-crystal nanoplate rings with predefined orientation and smooth surface (Supplementary Figure 10). The growth of orientation-defined 2D chalcogenide crystals on layered substrates reflects the essence of van der Waals epitaxy.

### **Supplementary Note 7. Micro-ARPES measurements of 2D Bi<sub>2</sub>Se<sub>3</sub> crystal array on insulating mica**

To directly observe the electronic band structure of individual 2D Bi<sub>2</sub>Se<sub>3</sub> crystals, we have carried out micro-spot angle-resolved photoemission spectroscopy (micro-ARPES) on as-obtained Bi<sub>2</sub>Se<sub>3</sub> crystal arrays grown on insulating mica substrates (Supplementary Figure 13). Micro-ARPES measurements were conducted at the spectromicroscopy beamline at Elettra Synchrotron Radiation lab in Italy, with the high spatial resolution of

below 1  $\mu\text{m}$ , energy resolution at 70 meV and angle resolution 0.5  $^\circ$ . To avoid charging effect of mica substrates, samples were covered with aligned arrays of carbon nanotubes dry-transferred from vertical array of carbon nanotube forests. The exposed surface of the 2D crystal sample was cleaned by several cycles of Ar-sputtering and annealing under vacuum before the micro-ARPES measurements.

### **Supplementary Note 8. Transport measurements of $\text{Bi}_2\text{Se}_3$ nanoplates from a 2D crystal array**

We selected individual 2D  $\text{Bi}_2\text{Se}_3$  crystals from a crystal array grown on the mica substrate and directly fabricated a Hall-bar device by electron beam lithography (EBL). An additional conductive protective coating (SX AR-PC-5000) was used on PMMA photoresist to prevent the charge accumulation on the insulating mica substrate during EBL. The temperature-dependent carrier concentration and carrier mobility of a Hall bar device of a  $\text{Bi}_2\text{Se}_3$  nanoplate was measured. The thickness of the  $\text{Bi}_2\text{Se}_3$  nanoplate was determined by AFM to be  $\sim 30$  QLs (Supplementary Figure 14). A room temperature carrier mobility  $\mu_n = 1750 \text{ cm}^2 \text{ V}^{-1} \text{ s}^{-1}$  are obtained, which is the highest value reported for  $\text{Bi}_2\text{Se}_3$  nanostructures such as nanowires, nanoribbons, 2D nanoplates, and thin films.

### **Supplementary Note 9. Grid networks containing 2D $\text{Bi}_2\text{Se}_3$ crystals for flexible transparent electrodes**

Large-area and high-quality grid networks containing 2D  $\text{Bi}_2\text{Se}_3$  crystals with controlled thickness and well-aligned positions are directly produced by this patterning technique on mica substrates (Supplementary Figure 16a). The 2D  $\text{Bi}_2\text{Se}_3$  grid structures with metallic surface states can significantly improve the visible transparency in comparison with continuous films (Supplementary Figure 16b). As-grown topological grid electrodes exhibit a flat and high transmittance of more than 85 % from visible to near-infrared region. On the other hand, the sheet electrical conductivity of topological grid electrodes over large area can be as low as  $\sim 2.0 \text{ k}\Omega/\text{sq}$ . (Supplementary Figure 16c-16e) In addition to broadband transparency and good electrical conductivity, this high-

quality topological grid electrode possesses outstanding mechanical durability and excellent stability to environmental perturbations.

### **Supplementary Note 10. Transport and photoresponse measurements of 2D In<sub>2</sub>Se<sub>3</sub> crystals transferred onto SiO<sub>2</sub>/Si substrate**

The patterned In<sub>2</sub>Se<sub>3</sub> crystal is n-type semiconductor with suitable direct bandgap (~1.3 eV) and extraordinary photoresponse (Supplementary Figure 17). Electronic transport measurements on the 2D In<sub>2</sub>Se<sub>3</sub> crystals were performed by using a back-gated FET configuration (Supplementary Figure 17a). The 2D In<sub>2</sub>Se<sub>3</sub> crystals were transferred onto 300-nm-thick SiO<sub>2</sub>/Si substrate and defined into four-probe configuration by standard electron beam lithography, followed by the thermal evaporation of metal contacts (10-nm-thick indium, 60-nm-thick gold). The typical electrical characterization of 2D In<sub>2</sub>Se<sub>3</sub> crystal devices in dark state were shown in Supplementary Figure 17b. The twenty-three studied devices display similar behavior. The measured current-voltage curves at various gate voltages ( $V_g$  from -40 V to 20 V) are linear (Supplementary Figure 17b), indicating good ohmic contacts. The source-drain current increased when the gate voltage increased from -40 V to 20 V, which exhibit n-type nature of the In<sub>2</sub>Se<sub>3</sub> transistor. As shown in Supplementary Figure 17c, the In<sub>2</sub>Se<sub>3</sub> device produced the remarkable change of the slope of current-voltage curve when the channel illuminated by a focused laser, indicating that the photocurrent generation originated from the photoconductive mechanism. The spatial photocurrent map was recorded by a focused laser beam scanning over the whole photodetector under a fixed bias. It is distinct that the photocurrent was strongly generated in the whole 2D In<sub>2</sub>Se<sub>3</sub> crystal channel, weakly in the two electrodes, which can attribute to the ohmic contacts between the In<sub>2</sub>Se<sub>3</sub> channel and metallic electrodes. A stable and repeatable operation of dynamic photoresponse was observed in the 2D In<sub>2</sub>Se<sub>3</sub> crystal. Supplementary Figure 17d presents the good photoresponse properties of the In<sub>2</sub>Se<sub>3</sub> device with light illumination off and on. The photoresponse ratio ( $I_{\text{light}}/I_{\text{dark}}$ ) is ~860.

### Supplementary Reference

1. Xia, Y. & Whitesides, G. M. Soft lithography. *Angew. Chem. Int. Ed.* 37, 550 (1998).
2. Jiao, L. Y.; Fan, B.; Xian, X. J.; Wu, Z. Y.; Zhang, J. & Liu, Z. F. Creation of nanostructures with poly(methyl methacrylate)-mediated nanotransfer printing. *J. Am. Chem. Soc.* 130, 12612 (2008).
